# Supplementary material for: Adiponectin accounts for gender differences in hepatocellular carcinoma incidence
Source: PubMed Central journal article supplement — J Exp Med. 2019 Apr 3;216(5):1108–19. doi: 10.1084/jem.20181288 (PMC6504215; doi:10.1084/jem.20181288), 2019-04-03
Supplement: JEM_20181288_sm.pdf [file JEM_20181288_sm.pdf]

## Supplemental material

Manieri et al., <https://doi.org/10.1084/jem.20181288>

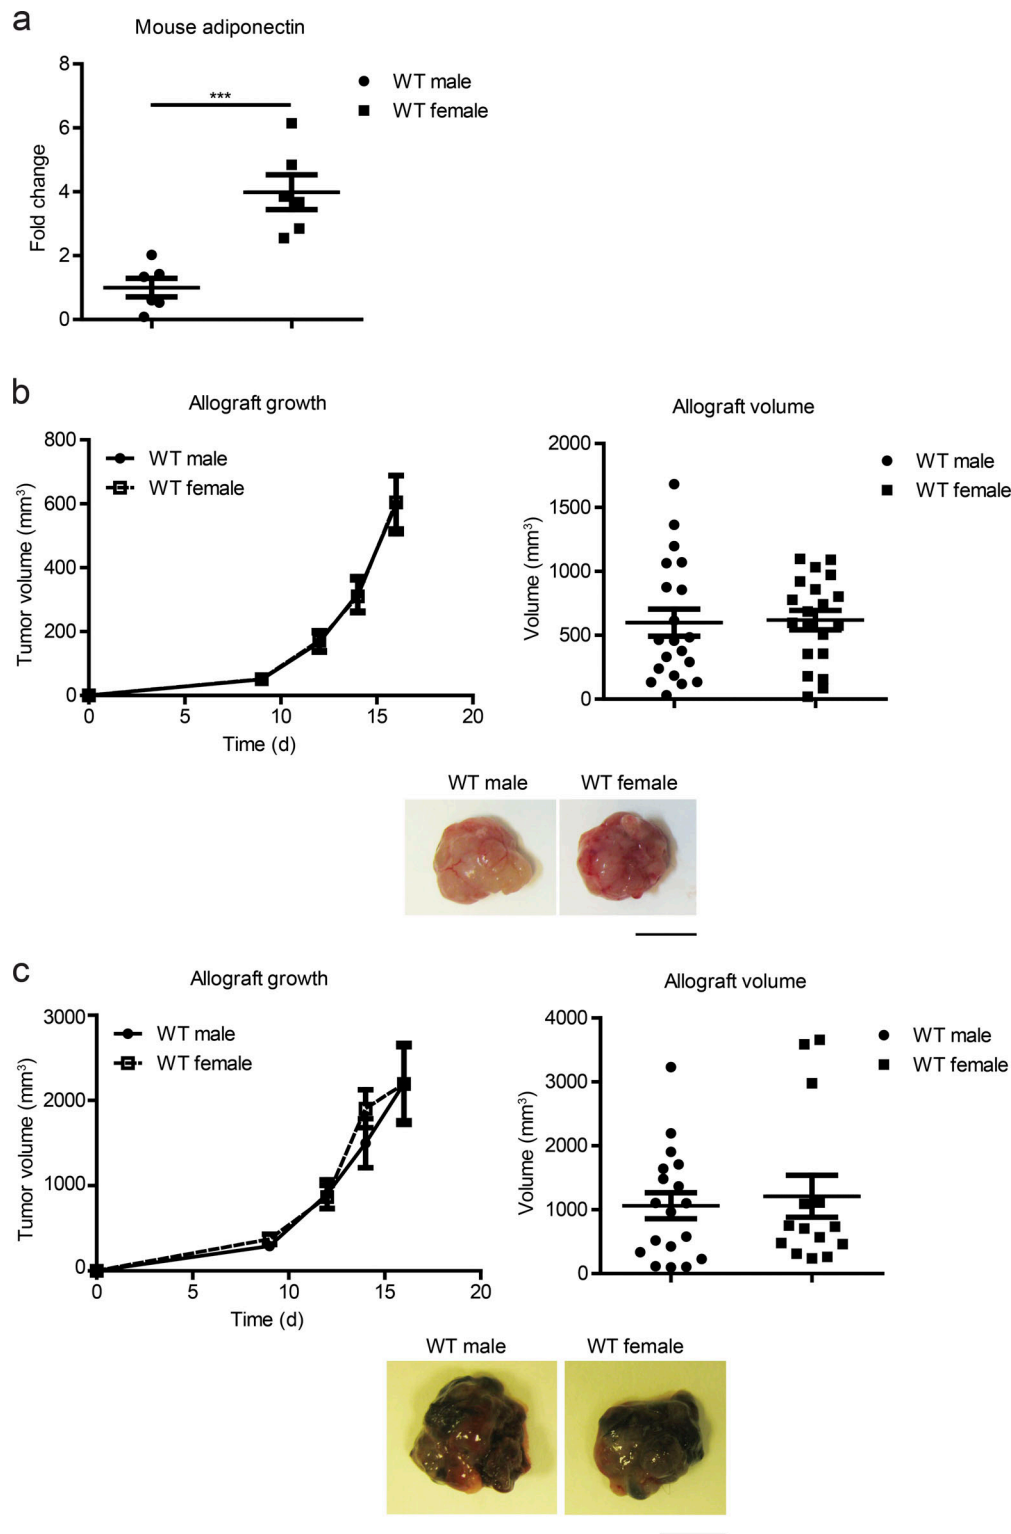

Figure S1. **Adiponectin quantification and specificity of gender differences in HCC.** **(a)** Circulating levels of adiponectin were measured in 11–12-wk-old female and male mice. Data are normalized to male mice and shown as means  $\pm$  SEM; \*\*\*,  $P < 0.001$ ; Student's  $t$  test;  $n = 6$ . **(b)** Representative allografts and tumor volume quantification in WT male and female mice during the experiment and at sacrifice 3 wk after subcutaneous injection with  $5 \times 10^5$  MC-38 cells (colon adenocarcinoma-derived cells) in each flank. Data are shown as means  $\pm$  SEM; nonsignificant differences were found; two-way ANOVA coupled with Bonferroni's multiple comparisons test (allograft growth); Student's  $t$  test (allograft volume);  $n = 20$  tumors (10 mice per genotype). Bar, 1 cm. **(c)** Representative allografts and tumor volume quantification in WT male and female mice during the experiment and at sacrifice 2 wk after subcutaneous injection with  $5 \times 10^5$  B16-F10 cells (melanoma-derived cells) in each flank. Data are shown as means  $\pm$  SEM; nonsignificant differences were found; two-way ANOVA coupled with Bonferroni's multiple comparisons test (allograft growth); Student's  $t$  test (allograft volume); WT male  $n = 18$  tumors (10 mice); WT female  $n = 14$  tumors (7 mice). Bar, 1 cm.

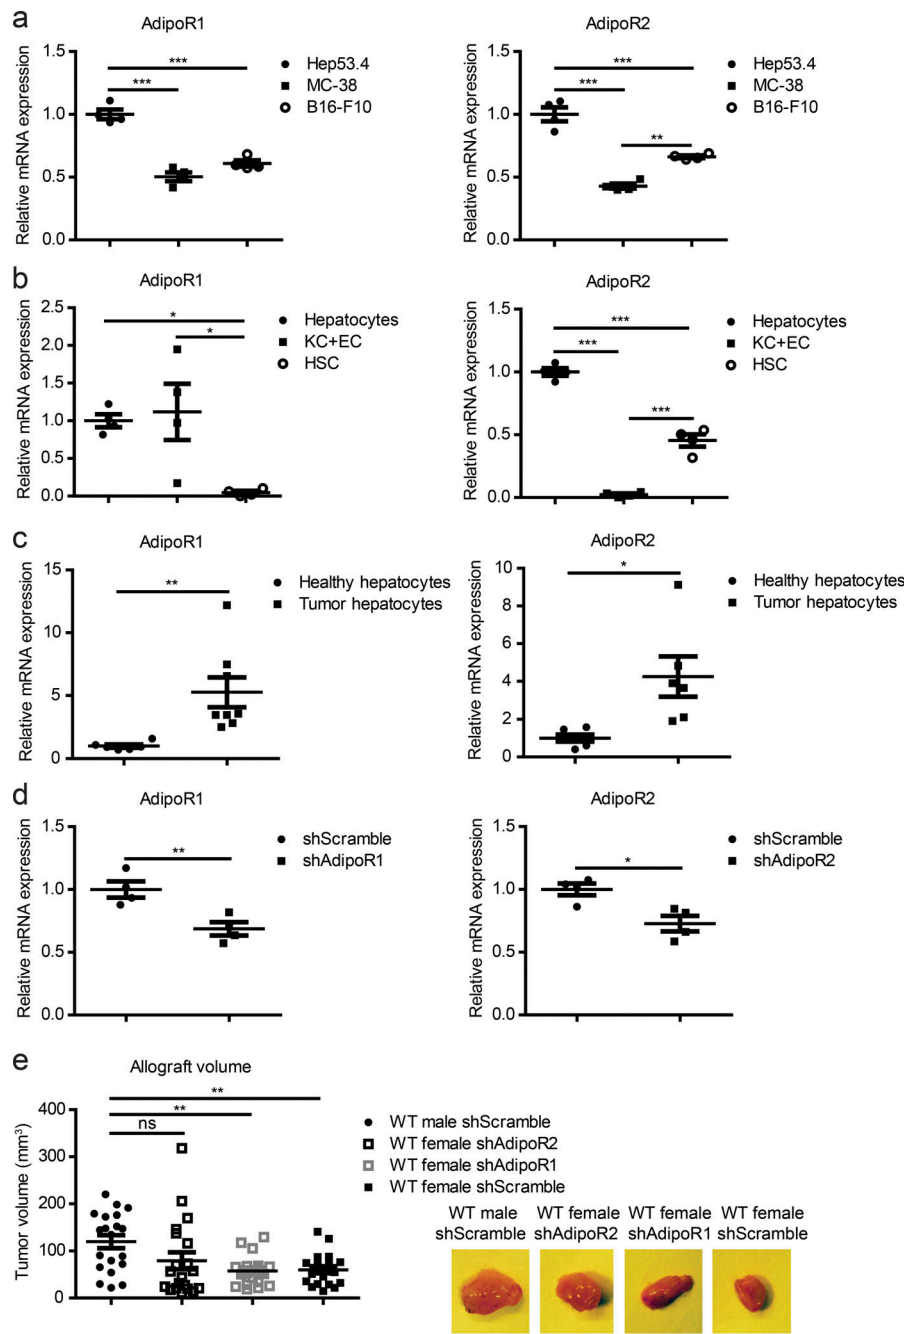

**Figure S2. Analysis of adiponectin receptors expression and their role in tumor growth.** **(a)** qRT-PCR analysis of adiponectin receptors 1 and 2 (*AdipoR1* and *AdipoR2*) in Hep53.4, MC-38, or B16-F10 tumor cells. mRNA expression was normalized to the amount of *Gapdh* mRNA in each sample. Data are normalized to Hep53.4 cells and shown as means  $\pm$  SEM; \*\*,  $P < 0.01$ ; \*\*\*,  $P < 0.001$ ; one-way ANOVA coupled with Bonferroni's multiple comparisons test;  $n = 4$ . **(b)** qRT-PCR analysis of *AdipoR1* and *AdipoR2* in different liver cell populations. mRNA expression was normalized to the amount of *Gapdh* mRNA in each sample. Data are normalized to hepatocytes and shown as means  $\pm$  SEM; \*,  $P < 0.05$ ; \*\*\*,  $P < 0.001$ ; one-way ANOVA coupled with Bonferroni's multiple comparisons test;  $n = 4$ . **(c)** qRT-PCR analysis of *AdipoR1* and *AdipoR2* in healthy hepatocytes and hepatocytes derived from hepatic tumors of C57BL/6J mice treated with DEN at P14 and 300  $\mu\text{g/liter}$  TAA administered in the drinking water for 26 wk. mRNA expression was normalized to the amount of *Gapdh* mRNA in each sample. Data are normalized to healthy hepatocytes and shown as means  $\pm$  SEM; \*,  $P < 0.05$ ; \*\*,  $P < 0.01$ ; Student's *t* test with Welch's correction; healthy hepatocytes  $n = 6$ ; tumor hepatocytes  $n = 6-8$ . **(d)** qRT-PCR analysis of *AdipoR1* in Hep53.4 treated with a shRNA against *AdipoR1* (shAdipoR1) or a scrambled control sequence, and analysis of *AdipoR2* in Hep53.4 cells treated with a shRNA against *AdipoR2* (shAdipoR2) or a scrambled control sequence. mRNA expression was normalized to the amount of *Gapdh* mRNA in each sample. Data are normalized to shScramble cells and shown as means  $\pm$  SEM; \*,  $P < 0.05$ ; \*\*,  $P < 0.01$ ; Student's *t* test;  $n = 4$ . **(e)** Representative allografts and tumor volume quantification in WT mice with hepatic tumors lacking *AdipoR1* or *AdipoR2* expression. Mice received subcutaneous injections with  $1 \times 10^6$  Hep53.4 cells per flank, previously transduced with shRNA targeting *AdipoR1*, *AdipoR2* or a control sequence (shScramble). Mice were sacrificed 3 wk after Hep53.4 cell injection. Data are shown as means  $\pm$  SEM; \*\*,  $P < 0.01$ ; nonsignificant differences (ns); one-way ANOVA coupled with Bonferroni's multiple comparisons test; WT  $n = 20$  tumors (10 mice per group), except WT female shAdipoR1  $n = 18$  tumors (10 mice). Bar, 1 cm.

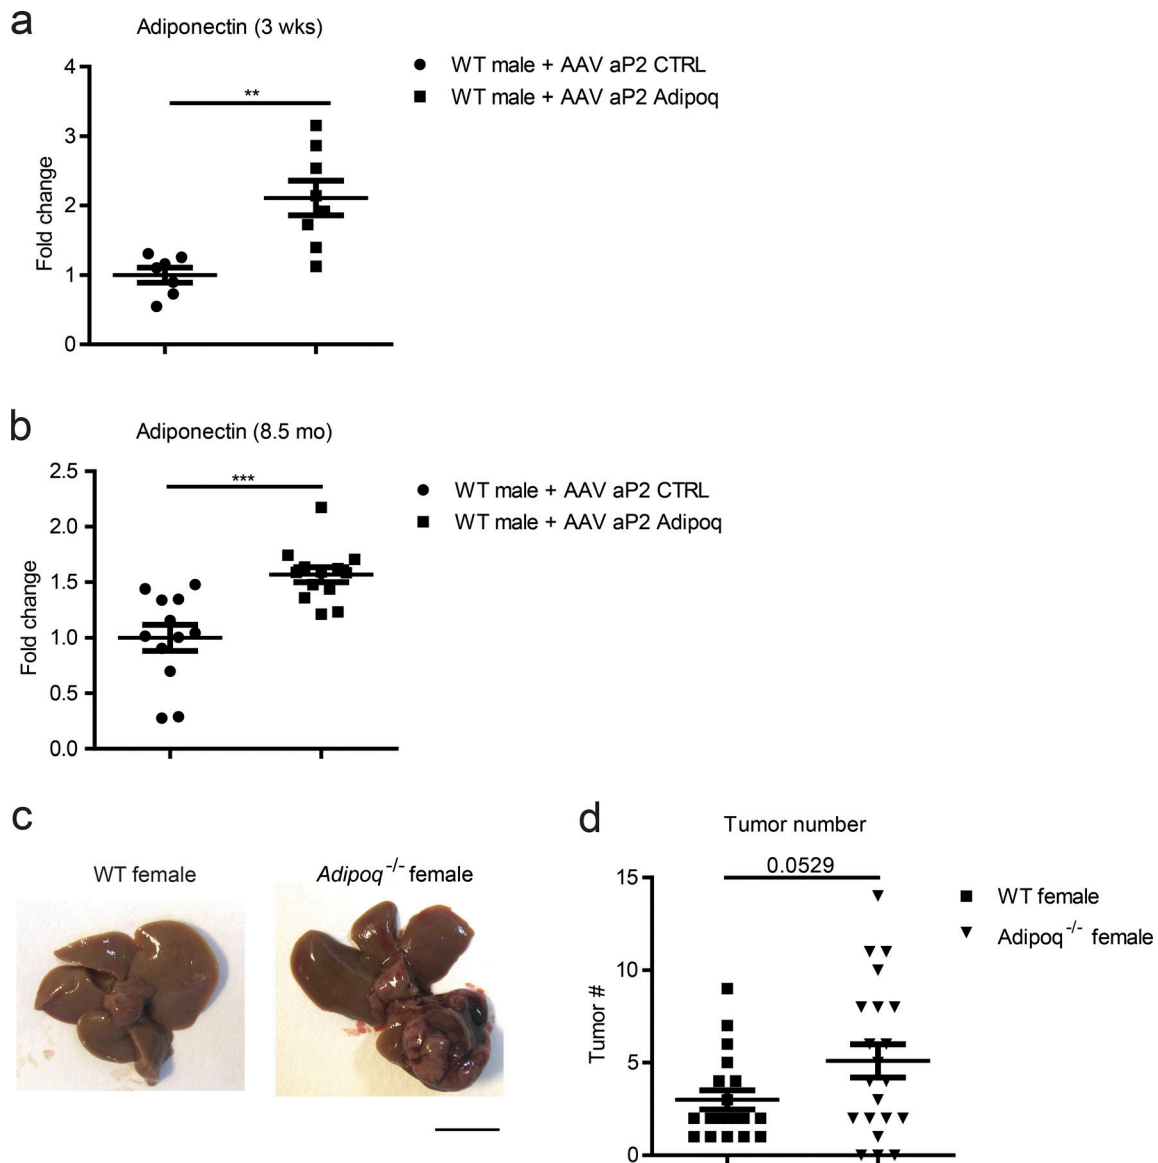

Figure S3. **Adiponectin quantification and overexpression in mice and effect of adiponectin deficiency in female mice.** **(a and b)** 6–7-wk-old WT male mice were injected with adeno-associated virus carrying a control sequence (WT male + AAV aP2 CTRL) or the adiponectin gene under control of the aP2 promoter (WT male + AAV aP2 Adipoq) at P1 and received an i.p. DEN injection (50 mg/kg body weight) 14 d later. AAV, adeno-associated virus; CTRL, control. **(a)** Quantification of circulating levels of adiponectin 3 wk after virus injection. Data are shown as means  $\pm$  SEM; \*\*,  $P < 0.01$ ; Student's *t* test with Welch's correction; WT male + AAV aP2 CTRL  $n = 7$ ; WT male + AAV aP2 Adipoq  $n = 8$ . **(b)** Quantification of circulating levels of adiponectin 8.5 mo after virus injection. Data are shown as means  $\pm$  SEM; \*\*\*,  $P < 0.001$ ; Student's *t* test; WT male + AAV aP2 CTRL  $n = 12$ ; WT male + AAV aP2 Adipoq  $n = 13$ . **(c)** HCC development 8 mo after i.p. injection with DEN (50 mg/kg) on P14 in WT and *Adipoq*<sup>-/-</sup> female mice. Bar, 1 cm. **(d)** Tumor number was determined at sacrifice. Data are shown as means  $\pm$  SEM; Student's *t* test with Welch's correction; WT female  $n = 19$ ; *Adipoq*<sup>-/-</sup> female  $n = 21$ .

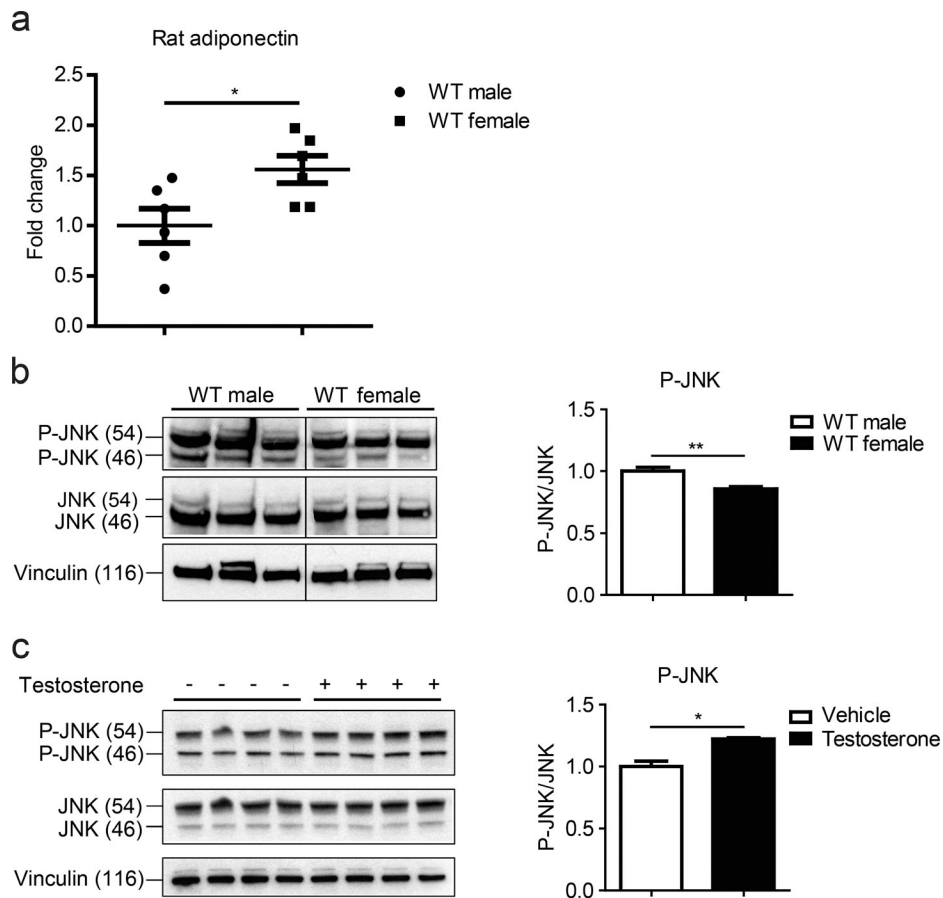

Figure S4. **Gender disparity in rat adiponectin, mice adipose tissue, and human adipocytes JNK phosphorylation.** (a) Circulating levels of adiponectin were measured in WT male and female rats. Data are normalized to male rats. Data are shown as means ± SEM; \*,  $P < 0.05$ ; Student's  $t$  test;  $n = 6$ . (b) Immunoblot analysis and quantification of phospho-JNK and JNK in adipose tissue from WT male and female mice. Vinculin protein expression was monitored as a loading control. Data are shown as means ± SEM; \*\*,  $P < 0.01$ ; Student's  $t$  test; WT male  $n = 3$ ; WT female  $n = 4$ . (c) Immunoblot analysis and quantification of phospho-JNK and JNK in human differentiated adipocytes after treatment with testosterone (1,200 nM for 30 min). Vinculin protein expression was monitored as a loading control. Data are shown as means ± SEM; \*,  $P < 0.05$ ; Student's  $t$  test with Welch's correction;  $n = 4$ .

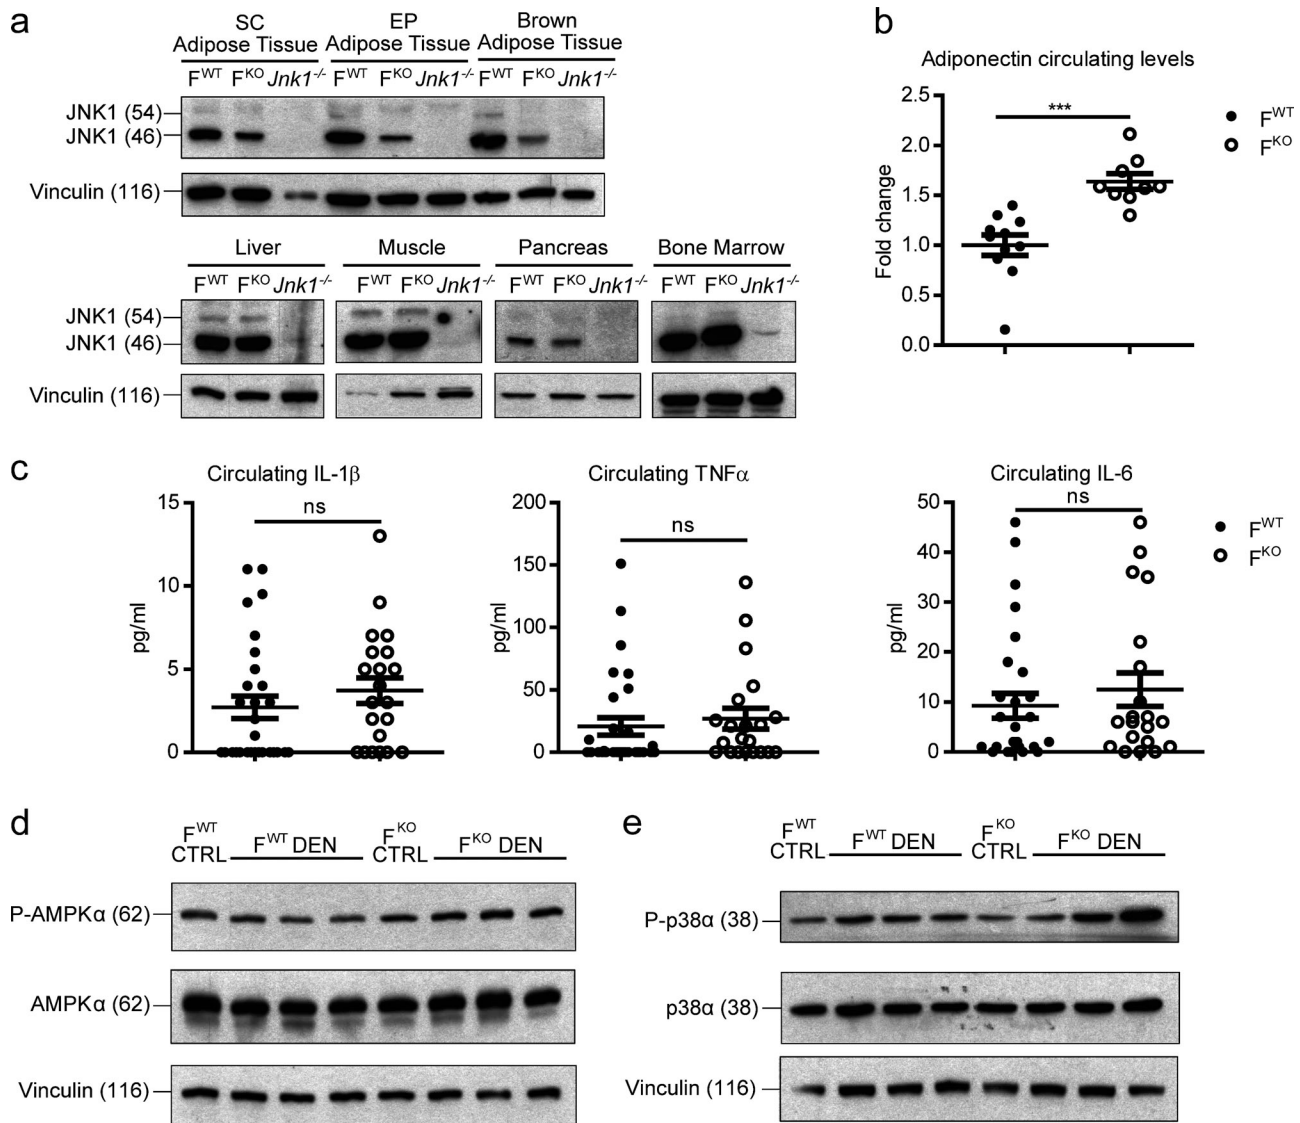

Figure S5. **Deletion of JNK1, cytokines levels in  $F^{WT}$  and  $F^{KO}$  mice, and adiponectin protection through AMPK $\alpha$  and p38 $\alpha$  activation.** (a) Control ( $F^{WT}$ ) and adipose tissue JNK1-deficient ( $F^{KO}$ ) mice were sacrificed at 10 wk, and different tissues were extracted and analyzed by immunoblotting. Tissues from  $Jnk1^{-/-}$  mice were used as a control. EP, epididymal; SC, subcutaneous. Vinculin protein expression was monitored as a loading control. (b) Circulating levels of adiponectin were measured in control ( $F^{WT}$ ) and adipose tissue JNK1-deficient ( $F^{KO}$ ) mice. Data are normalized to  $F^{WT}$  adiponectin levels and are shown as means  $\pm$  SEM; \*\*\*,  $P < 0.001$ ; Student's  $t$  test;  $F^{WT} n = 11$ ;  $F^{KO} n = 9$ . (c) Control ( $F^{WT}$ ) and adipose tissue JNK1-deficient ( $F^{KO}$ ) mice were injected i.p. with DEN (50 mg/kg) on P14. Serum was analyzed after 8 mo on a Luminex platform to measure the levels of TNF $\alpha$ , IL-1 $\beta$ , and IL-6 adipokines. Data are shown as means  $\pm$  SEM; nonsignificant differences were found (ns); Student's  $t$  test;  $n = 20-30$ . (d and e)  $F^{WT}$  and  $F^{KO}$  mice were injected i.p. with DEN (50 mg/kg) or saline (CTRL) on P14. (d) Immunoblot analysis of phospho-AMPK $\alpha$ , AMPK $\alpha$ , and vinculin in livers obtained 1 mo after DEN injection. (e) Immunoblot analysis of phospho-p38 $\alpha$ , p38 $\alpha$ , and vinculin in livers obtained 1 mo after DEN injection.

Table S1. **Characteristics of women and men**

| <b>Variable</b>                 | <b>Women (n = 9)</b> | <b>Men (n = 10)</b> | <b>P value</b> |
|---------------------------------|----------------------|---------------------|----------------|
| Age (yr)                        | 49.7 (14.3)          | 58.1 (14.3)         | 0.278          |
| Hypertension (n)                | 1 (11.1)             | 2 (20)              | 0.542          |
| Diabetes mellitus (n)           | 0                    | 0                   | -              |
| BMI (kg/m <sup>2</sup> )        | 25.8 (3.5)           | 26.8 (4.5)          | 0.905          |
| Fasting blood sugar (mg/dl)     | 86.1 (12.8)          | 99 (10.5)           | 0.046          |
| AST (IU/liter)                  | 24.3 (12.9)          | 21.1 (5.1)          | 0.798          |
| ALT (IU/liter)                  | 32.5 (32.2)          | 30.3 (20.7)         | 0.878          |
| Alkaline phosphatase (IU/liter) | 77.4 (21.4)          | 95.3 (35.3)         | 0.536          |
| Bilirubin (mg/dl)               | 0.5 (0.3)            | 0.9 (0.5)           | 0.059          |
| Albumin (mg/dl)                 | 4.5 (0.3)            | 4.5 (0.6)           | 0.607          |
| Total cholesterol (mg/dl)       | 205.9 (50)           | 189.9 (47.9)        | 0.383          |
| Triglycerides (mg/dl)           | 118.7 (67.5)         | 116 (49.7)          | 0.902          |
| LDL-cholesterol (mg/dl)         | 121.7 (44.5)         | 123.7 (43.7)        | 0.945          |
| HDL-cholesterol (mg/dl)         | 62.1 (14.6)          | 42.9 (12.7)         | 0.035          |
| Adiponectin (μg/ml)             | 19.69 (2.663)        | 14.18 (3.620)       | 0.0016         |

Variables are presented as mean (SD) or absolute frequency (%) and are compared by means of Mann-Whitney *U* test or  $\chi^2$  test. ALT, alanine aminotransferase; AST, aspartate aminotransferase; BMI, body mass index; HDL, high-density lipoprotein; LDL, low-density lipoprotein.

Table S2. **qRT-PCR primers**

| <b>Gene</b>    | <b>Forward primer (5'→3')</b> | <b>Reverse primer (5'→3')</b> |
|----------------|-------------------------------|-------------------------------|
| <i>AdipoR1</i> | AATGGGGCTCCTTCTGGTAAC         | GGATGACTCTCCAACGTCCCT         |
| <i>AdipoR2</i> | GGCCCATCATGCTATGGAAC          | GTGAGGGATCACTCGCCATC          |
| <i>Gapdh</i>   | TGAAGCAGGCATCTGAGGG           | CGAAGGTGGAAGAGTGGGA           |

Table S3. **Solutions for hepatic perfusion**

| <b>Solution (ml)</b>     | <b>A</b> | <b>B</b> | <b>C</b> | <b>D</b>       |
|--------------------------|----------|----------|----------|----------------|
| SC-1                     | 100      | -        | -        | -              |
| SC-2                     | -        | 100      | 100      | 100            |
| DNase I (stock solution) | -        | -        | -        | 1 <sup>a</sup> |
| Collagenase D (mg)       | -        | -        | 110      | 80             |
| Pronase E (mg)           | -        | 40       | -        | 50             |

<sup>a</sup>DNase I stock solution: 2 mg/ml in GBSS-B.

Table S4. **Stock solutions for hepatic cell isolation**

| <b>Stock solution (mg)</b>                          | <b>SC1</b> | <b>SC2</b> | <b>GBSS-A</b> | <b>GBSS-B</b> |
|-----------------------------------------------------|------------|------------|---------------|---------------|
| EGTA                                                | 95         | -          | -             | -             |
| Glucose                                             | 450        | -          | 495.5         | 495.5         |
| HEPES                                               | 1,190      | 1,190      | -             | -             |
| KCl                                                 | 200        | 200        | 185           | 185           |
| Na <sub>2</sub> HPO <sub>4</sub> ·2H <sub>2</sub> O | 75.5       | 75.5       | 37.5          | 37.5          |
| NaCl                                                | 4,000      | 4,000      | -             | 4,000         |
| NaH <sub>2</sub> PO <sub>4</sub> ·H <sub>2</sub> O  | 39         | 39         | -             | -             |
| NaHCO <sub>3</sub>                                  | 175        | 175        | 113.5         | 113.5         |
| Phenol Red                                          | 3          | 3          | 3             | 3             |
| CaCl <sub>2</sub> ·2H <sub>2</sub> O                | -          | 280        | 112.5         | 112.5         |
| KH <sub>2</sub> PO <sub>4</sub>                     | -          | -          | 15            | 15            |
| MgCl <sub>2</sub> ·6H <sub>2</sub> O                | -          | -          | 105           | 105           |
| MgSO <sub>4</sub> ·7H <sub>2</sub> O                | -          | -          | 35            | 35            |
| H <sub>2</sub> O to (ml)                            | 500        | 500        | 500           | 500           |

For the density gradient medium, the following solutions were prepared before starting the perfusion of the liver: Nycodenz 1: 5.18 g/total volume 15 ml GBSS-A; Nycodenz 2: 3.63 g/total volume 25 ml GBSS-A.
